# Supplementary material for: Confirmation of Fusarium root rot resistance QTL Fsp-Ps 2.1 of pea under controlled conditions
Source: PubMed Central journal article supplement (PMC6417171; doi:10.1186/s12870-019-1699-9), 2019-03-12

# LGII\_BP-Duarte

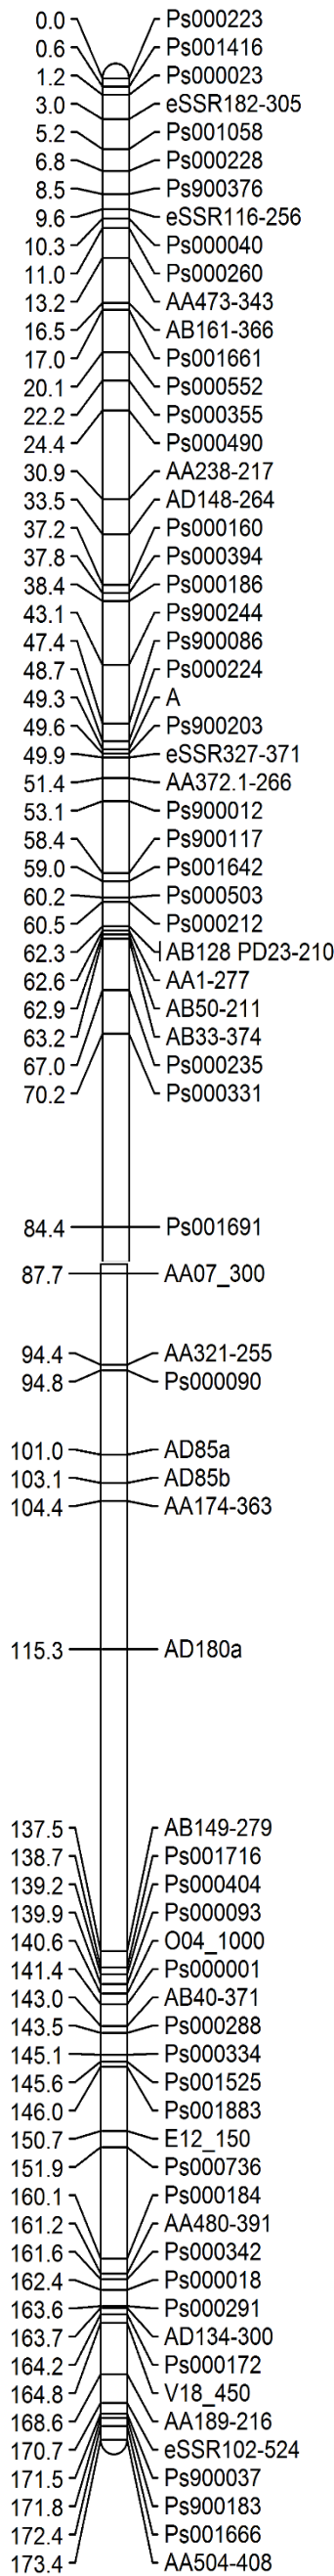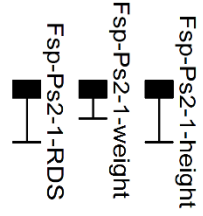

# LGIII\_BP-Duarte

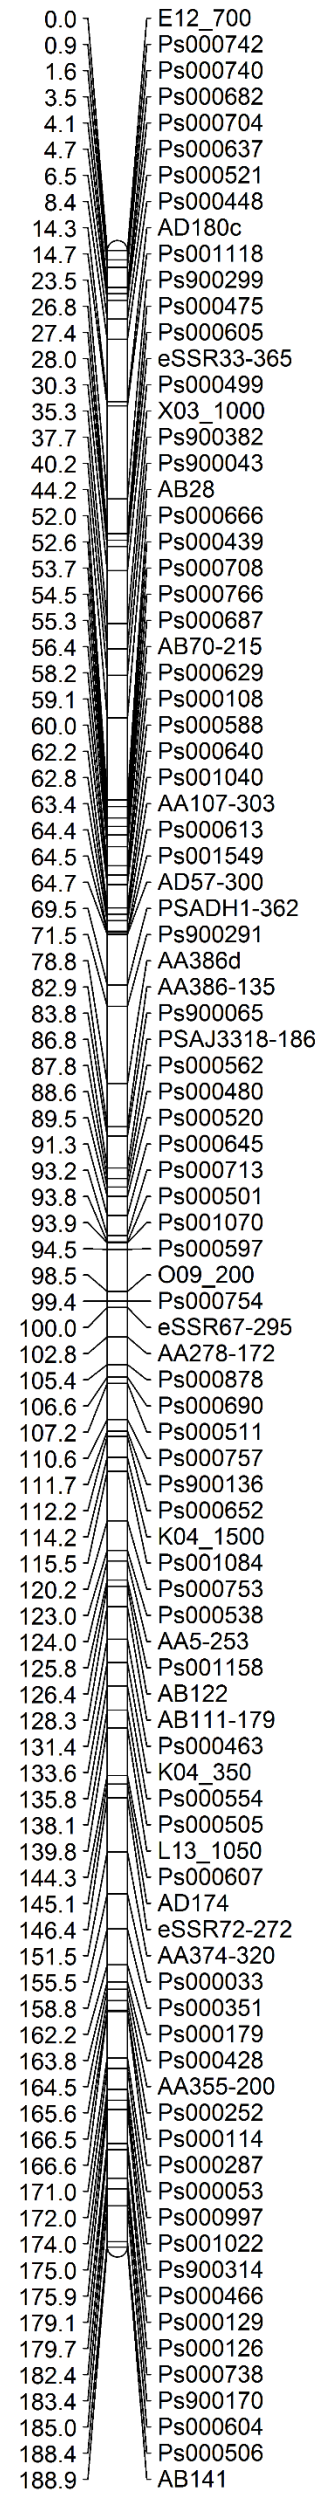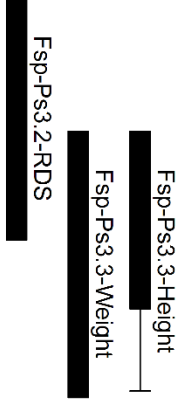

Supplement: 12870_2019_1699_MOESM4_ESM.pdf [file 12870_2019_1699_MOESM4_ESM.pdf]
